# Supplementary material
Source: PubMed Central journal article supplement (PMC4397345)
Supplement: 13197_2014_1581_MOESM3_ESM.pdf [file 13197_2014_1581_MOESM3_ESM.pdf]

# Tilapia Culture

---

*This page intentionally left blank*

# Tilapia Culture

---

**Abdel-Fattah M. El-Sayed**

*Oceanography Department, Faculty of Science,  
Alexandria University, Alexandria, Egypt*

CABI Publishing

**CABI Publishing is a division of CAB International**

CABI Publishing  
CAB International  
Wallingford  
Oxfordshire OX10 8DE  
UK

CABI Publishing  
875 Massachusetts Avenue  
7th Floor  
Cambridge, MA 02139  
USA

Tel: +44 (0)1491 832111  
Fax: +44 (0)1491 833508  
E-mail: [cabi@cabi.org](mailto:cabi@cabi.org)  
Website: [www.cabi-publishing.org](http://www.cabi-publishing.org)

Tel: +1 617 395 4056  
Fax: +1 617 354 6875  
E-mail: [cabi-nao@cabi.org](mailto:cabi-nao@cabi.org)

© A.-E.M. El-Sayed 2006. All rights reserved. No part of this publication may be reproduced in any form or by any means, electronically, mechanically, by photocopying, recording or otherwise, without the prior permission of the copyright owners.

A catalogue record for this book is available from the British Library, London, UK.

**Library of Congress Cataloging-in-Publication Data**

El-Sayed, Abdel-Fattah M., 1950-  
Tilapia culture / Abdel-Fattah M. El-Sayed.  
p. cm.  
Includes bibliographical references (p. ) and index.  
ISBN-13: 978-0-85199-014-9 (alk. paper)  
ISBN-10: 0-85199-014-2 (alk. paper)  
1. Tilapia. I. Title  
SH167.T54E42 2006  
639.3774--dc22

2005012005

Typeset in Baskerville by AMA DataSet Ltd, UK.  
Printed and bound in the UK by Biddles Ltd, King's Lynn.

# Contents

---

|                                                           |             |
|-----------------------------------------------------------|-------------|
| <b>Foreword</b> <i>R.R. Stickney</i>                      | <b>xi</b>   |
| <b>Preface</b>                                            | <b>xiii</b> |
| <b>Acknowledgements</b>                                   | <b>xv</b>   |
| <b>1 Current State and Future Potential</b>               | <b>1</b>    |
| 1.1 Historical Review                                     | 1           |
| 1.2 Global Tilapia Production                             | 3           |
| 1.2.1 Capture fisheries                                   | 3           |
| 1.2.2 Aquaculture                                         | 3           |
| 1.2.3 Major producers                                     | 5           |
| 1.2.4 Major cultured species                              | 6           |
| 1.3 Tilapia Production in Asia                            | 7           |
| 1.3.1 Major producers                                     | 9           |
| 1.3.2 Major cultured species                              | 12          |
| 1.4 Tilapia Production in Africa                          | 13          |
| 1.4.1 Major producers                                     | 13          |
| 1.4.2 Major cultured species                              | 17          |
| 1.5 Tilapia Production in South America                   | 17          |
| 1.5.1 Major producers                                     | 17          |
| 1.5.2 Major cultured species                              | 17          |
| 1.6 Tilapia Production in North America and the Caribbean | 20          |
| 1.6.1 Major producers                                     | 20          |
| 1.6.2 Major cultured species                              | 20          |
| 1.7 Future Potential                                      | 20          |
| 1.8 Constraints                                           | 24          |
| <b>2 Basic Biology and Ecology</b>                        | <b>25</b>   |
| 2.1 Introduction                                          | 25          |
| 2.2 Taxonomy                                              | 25          |
| 2.3 Body Shape and External Morphology                    | 26          |
| 2.4 Geographical Distribution                             | 26          |
| 2.5 Factors Affecting Tilapia Distribution                | 28          |
| 2.5.1 Habitat diversity                                   | 28          |
| 2.5.2 Environmental conditions                            | 28          |

---

|          |                                                     |           |
|----------|-----------------------------------------------------|-----------|
| 2.6      | Introductions and Transfers                         | 28        |
| 2.6.1    | Introductions in Africa                             | 28        |
| 2.6.2    | Introductions outside Africa                        | 29        |
| 2.7      | Feeding Habits                                      | 29        |
| 2.8      | Gut Morphology                                      | 32        |
| 2.9      | Closing Remarks                                     | 33        |
| <b>3</b> | <b>Environmental Requirements</b>                   | <b>34</b> |
| 3.1      | Introduction                                        | 34        |
| 3.2      | Temperature                                         | 34        |
| 3.3      | Salinity                                            | 38        |
| 3.4      | Dissolved Oxygen                                    | 41        |
| 3.5      | Ammonia and Nitrite                                 | 42        |
| 3.5.1    | Ammonia                                             | 42        |
| 3.5.2    | Nitrite                                             | 43        |
| 3.6      | pH                                                  | 43        |
| 3.7      | Photoperiod                                         | 44        |
| 3.8      | Water Turbidity                                     | 45        |
| 3.9      | Closing Remarks                                     | 46        |
| <b>4</b> | <b>Semi-intensive Culture</b>                       | <b>47</b> |
| 4.1      | Introduction                                        | 47        |
| 4.2      | An Overview of Pond Fertilization                   | 47        |
| 4.3      | Fertilization of Tilapia Ponds                      | 48        |
| 4.3.1    | Organic fertilizers                                 | 48        |
| 4.3.2    | Inorganic fertilizers                               | 52        |
| 4.3.3    | Periphyton-based pond culture                       | 52        |
| 4.4      | Supplemental Feeding                                | 53        |
| 4.4.1    | Rationale                                           | 53        |
| 4.4.2    | Timing of supplemental feeding                      | 54        |
| 4.4.3    | On-farm feed resources                              | 55        |
| 4.4.4    | On-farm feed formulation and preparation            | 57        |
| 4.5      | Polyculture                                         | 59        |
| 4.6      | Integrated Culture                                  | 61        |
| 4.6.1    | Tilapia culture in rice fields                      | 61        |
| 4.6.2    | Animal–tilapia culture                              | 65        |
| 4.7      | Economic Efficiency of Integrated Culture           | 67        |
| 4.8      | Closing Remarks                                     | 68        |
| <b>5</b> | <b>Intensive Culture</b>                            | <b>70</b> |
| 5.1      | Introduction                                        | 70        |
| 5.2      | Stocking Density                                    | 70        |
| 5.3      | Intensive Culture in Earthen Ponds                  | 71        |
| 5.3.1    | Stocking density                                    | 71        |
| 5.3.2    | Water exchange                                      | 72        |
| 5.4      | Cage Culture                                        | 75        |
| 5.4.1    | Factors affecting cage culture                      | 76        |
| 5.4.2    | Cage culture in Asia                                | 76        |
| 5.4.3    | Cage culture in Africa                              | 80        |
| 5.4.4    | Cage culture in Latin America                       | 81        |
| 5.4.5    | Cage culture in fertilized ponds and pond effluents | 81        |
| 5.4.6    | Tilapia culture in sea cages                        | 83        |

---

|          |                                          |            |
|----------|------------------------------------------|------------|
| 5.5      | Tank and Raceway Culture                 | 83         |
| 5.5.1    | Tank size and shape                      | 84         |
| 5.5.2    | Stocking density and fish size           | 84         |
| 5.5.3    | Water exchange and flow rate             | 84         |
| 5.5.4    | Raceway culture                          | 85         |
| 5.6      | Green-water Tank Culture                 | 87         |
| 5.7      | Tilapia Culture in Recirculating Systems | 88         |
| 5.8      | Effluent Treatment and Management        | 90         |
| 5.8.1    | Waste settlement and removal             | 90         |
| 5.8.2    | Removal of ammonia and nitrites          | 90         |
| 5.8.3    | Water discharge                          | 91         |
| 5.9      | Tilapia Production in Aquaponic Systems  | 92         |
| 5.10     | Closing Remarks                          | 94         |
| <b>6</b> | <b>Nutrition and Feeding</b>             | <b>95</b>  |
| 6.1      | Introduction                             | 95         |
| 6.2      | Protein Requirements                     | 95         |
| 6.3      | Amino Acid Requirements                  | 97         |
| 6.4      | Protein Sources                          | 98         |
| 6.4.1    | Animal protein sources                   | 98         |
| 6.4.2    | Plant protein sources                    | 101        |
| 6.4.3    | Single-cell proteins                     | 103        |
| 6.5      | Economic Evaluation of Protein Sources   | 103        |
| 6.6      | Measurement of Dietary Energy            | 104        |
| 6.7      | Dietary Lipid Requirements               | 104        |
| 6.7.1    | Essential fatty acid (EFA) requirements  | 104        |
| 6.8      | Carbohydrate Utilization                 | 106        |
| 6.9      | Vitamin Requirements                     | 107        |
| 6.10     | Mineral Requirements                     | 107        |
| 6.11     | Feeding Regimes and Practices            | 110        |
| 6.12     | Closing Remarks                          | 111        |
| <b>7</b> | <b>Reproduction and Seed Production</b>  | <b>112</b> |
| 7.1      | Introduction                             | 112        |
| 7.2      | Modes of Reproduction                    | 112        |
| 7.3      | Age and Size at First Maturity           | 113        |
| 7.4      | Fecundity and Egg Characteristics        | 114        |
| 7.5      | Broodstock Management                    | 116        |
| 7.5.1    | Broodstock selection                     | 116        |
| 7.5.2    | Stocking density and sex ratio           | 116        |
| 7.5.3    | Spawning intervals                       | 117        |
| 7.5.4    | Broodstock exchange                      | 117        |
| 7.6      | Broodstock Nutrition                     | 118        |
| 7.6.1    | Protein requirements                     | 118        |
| 7.6.2    | Lipid requirements                       | 119        |
| 7.6.3    | Vitamin and mineral requirements         | 120        |
| 7.6.4    | Feeding management                       | 120        |
| 7.7      | Environmental Factors                    | 121        |
| 7.7.1    | Dissolved oxygen                         | 121        |
| 7.7.2    | Temperature                              | 121        |
| 7.7.3    | Salinity                                 | 122        |
| 7.7.4    | Photoperiod and light intensity          | 123        |
| 7.7.5    | Water level and exchange                 | 124        |

---

|          |                                             |            |
|----------|---------------------------------------------|------------|
| 7.8      | Production of Monosex Tilapia               | 125        |
| 7.8.1    | Manual sexing                               | 125        |
| 7.8.2    | Hormonal sex reversal                       | 125        |
| 7.8.3    | Hybridization                               | 131        |
| 7.9      | Seed Production                             | 132        |
| 7.9.1    | Hatching systems                            | 132        |
| 7.9.2    | Egg hatching and yolk-sac absorption        | 134        |
| 7.10     | Larval Rearing and Growth                   | 135        |
| 7.10.1   | Stocking density                            | 135        |
| 7.10.2   | Food and feeding regimes                    | 136        |
| 7.10.3   | Photoperiod                                 | 137        |
| 7.10.4   | Water flow and replacement                  | 137        |
| 7.11     | Closing Remarks                             | 137        |
| <b>8</b> | <b>Stress and Diseases</b>                  | <b>139</b> |
| 8.1      | Introduction                                | 139        |
| 8.2      | Stress                                      | 139        |
| 8.3      | Major Diseases                              | 140        |
| 8.4      | Parasitic Diseases                          | 140        |
| 8.4.1    | Protozoan diseases                          | 140        |
| 8.4.2    | Other ciliates                              | 144        |
| 8.4.3    | Flagellated protozoa                        | 145        |
| 8.4.4    | Sporozoan diseases                          | 145        |
| 8.4.5    | Metazoan parasites                          | 146        |
| 8.4.6    | Parasitic crustaceans                       | 148        |
| 8.5      | Bacterial Diseases                          | 148        |
| 8.5.1    | Motile <i>Aeromonas</i> septicaemia (MAS)   | 149        |
| 8.5.2    | <i>Pseudomonas</i>                          | 150        |
| 8.5.3    | Vibriosis                                   | 151        |
| 8.5.4    | Streptococcosis                             | 151        |
| 8.5.5    | Staphylococcosis                            | 152        |
| 8.5.6    | Mycobacteriosis                             | 153        |
| 8.5.7    | Edwardsiellosis                             | 153        |
| 8.5.8    | Columnaris disease                          | 154        |
| 8.5.9    | Other bacterial diseases                    | 154        |
| 8.6      | Fungal Diseases                             | 154        |
| 8.6.1    | Saprolegniasis                              | 154        |
| 8.6.2    | <i>Branchiomyces</i>                        | 155        |
| 8.6.3    | <i>Aspergillus</i>                          | 155        |
| 8.7      | Viral Diseases                              | 155        |
| 8.8      | Non-infectious Diseases and Disorders       | 156        |
| 8.8.1    | Gas bubble disease                          | 156        |
| 8.8.2    | Nutritional diseases                        | 156        |
| 8.8.3    | Disorders caused by pollutants              | 157        |
| 8.9      | Closing Remarks                             | 158        |
| <b>9</b> | <b>Harvesting, Processing and Economics</b> | <b>160</b> |
| 9.1      | Introduction                                | 160        |
| 9.2      | Harvesting                                  | 160        |
| 9.3      | Handling                                    | 162        |
| 9.4      | Processing                                  | 163        |
| 9.4.1    | Cooling                                     | 163        |
| 9.4.2    | Filleting                                   | 163        |



---

|           |                                                                  |            |
|-----------|------------------------------------------------------------------|------------|
| 9.4.3     | Rigor mortis                                                     | 164        |
| 9.4.4     | Radiation                                                        | 164        |
| 9.5       | Marketing and Economics                                          | 165        |
| 9.5.1     | System economics                                                 | 165        |
| 9.5.2     | Risk analysis                                                    | 166        |
| 9.6       | Domestic Markets                                                 | 167        |
| 9.7       | Global Markets                                                   | 168        |
| 9.7.1     | The US market                                                    | 170        |
| 9.7.2     | Other international markets                                      | 174        |
| 9.8       | Closing Remarks                                                  | 174        |
| <b>10</b> | <b>The Role of Tilapia Culture in Rural Development</b>          | <b>176</b> |
| 10.1      | Introduction                                                     | 176        |
| 10.2      | Tilapia and Rural Development                                    | 178        |
| 10.3      | Tilapia and Rural Development in Asia                            | 180        |
| 10.3.1    | The Philippines                                                  | 180        |
| 10.3.2    | Thailand                                                         | 182        |
| 10.3.3    | Bangladesh                                                       | 184        |
| 10.3.4    | Other Asian countries                                            | 185        |
| 10.4      | Tilapia and Rural Development in Africa                          | 185        |
| 10.4.1    | Tilapia and food security                                        | 186        |
| 10.4.2    | Aquaculture/agriculture integration                              | 188        |
| 10.5      | Tilapia and Rural Development in Latin America and the Caribbean | 189        |
| 10.6      | Closing Remarks                                                  | 191        |
| <b>11</b> | <b>Recent Technological Innovations</b>                          | <b>192</b> |
| 11.1      | Introduction                                                     | 192        |
| 11.2      | Transgenesis                                                     | 192        |
| 11.2.1    | Growth enhancement                                               | 193        |
| 11.2.2    | Cold resistance                                                  | 194        |
| 11.2.3    | Producing pharmaceutical products                                | 194        |
| 11.2.4    | Risk assessment                                                  | 195        |
| 11.3      | Genetically Improved Farmed Tilapia (GIFT)                       | 195        |
| 11.3.1    | Growth and survival                                              | 195        |
| 11.3.2    | Early and late maturation                                        | 196        |
| 11.3.3    | Red body colour                                                  | 196        |
| 11.3.4    | Cold resistance                                                  | 197        |
| 11.3.5    | GenoMar Supreme Tilapia and GET EXCEL tilapia                    | 198        |
| 11.4      | Gynogenesis, Androgenesis and Cloning                            | 198        |
| 11.5      | Triploidy                                                        | 199        |
| 11.6      | Production of Genetically Male Nile Tilapia (GMT)                | 201        |
| 11.7      | Disease Management                                               | 201        |
| 11.8      | Feed and Feeding                                                 | 203        |
| 11.8.1    | Amino acid versus mineral supplementation                        | 203        |
| 11.8.2    | Phytase supplementation                                          | 203        |
| 11.8.3    | Essential fatty acid (EFA) requirements                          | 204        |
| 11.8.4    | Feeding regimes                                                  | 204        |
| 11.9      | Innovations in Farming Systems                                   | 204        |
| 11.9.1    | Effluent treatment and management                                | 204        |
| 11.9.2    | Tilapia production in aquaponic systems                          | 205        |
| 11.10     | Future Prospects                                                 | 206        |

---

|           |                                                            |            |
|-----------|------------------------------------------------------------|------------|
| <b>12</b> | <b>Environmental Impacts</b>                               | <b>207</b> |
| 12.1      | Introduction                                               | 207        |
| 12.2      | Transfers and Introductions                                | 207        |
| 12.2.1    | Successful introductions                                   | 208        |
| 12.2.2    | Impacts on native aquatic species                          | 208        |
| 12.3      | Genetic Pollution                                          | 209        |
| 12.3.1    | Hybridization                                              | 209        |
| 12.3.2    | Inbreeding                                                 | 209        |
| 12.3.3    | Transgenesis                                               | 210        |
| 12.4      | Farm Effluents and Organic Enrichments                     | 210        |
| 12.5      | Bioactive Compounds                                        | 211        |
| 12.6      | Hormones                                                   | 212        |
| 12.7      | Reducing Environmental Impacts                             | 212        |
| 12.7.1    | Management of introductions and transfers                  | 212        |
| 12.7.2    | Effluent management                                        | 212        |
| 12.7.3    | Reducing nutrient loading through green-water tank culture | 214        |
| 12.7.4    | Removing nutrients through aquatic plants                  | 214        |
| 12.7.5    | Removing nutrients through aquaponic systems               | 214        |
| 12.8      | Closing Remarks                                            | 215        |
|           | <b>References</b>                                          | <b>216</b> |
|           | <b>General Index</b>                                       | <b>263</b> |
|           | <b>Species Index</b>                                       | <b>275</b> |

# Foreword

---

It seems highly fitting that a truly comprehensive book on tilapia culture should be authored by a scientist at the Alexandria University in Egypt, a country where, arguably, the farming of tilapia has its roots. I do not use the word 'comprehensive' glibly, for Dr El-Sayed brings together information on everything from the history of tilapia culture to the latest production practices being used around the world, covering everything from soup to nuts, or, in this case, morphology to socio-economics. The author has extensively mined the literature as well as obtaining additional information and photographs through his contacts with a number of aquaculturists from virtually all the tilapia-producing regions around the globe. The result is an excellent volume that will serve several purposes. It can be used as an introduction to this fascinating group of fishes for the interested layman, but primarily will serve as a valuable resource for those who are engaged in tilapia research or production, as well as those who teach about aquaculture.

Tilapia aquaculture is somewhat unique in that it occurs in virtually every type of water system in utilization today. Tilapia are produced in everything from ponds fertilized with manure to closed recirculating systems. Production occurs in freshwater and in brackish to ocean salinities. The types of production systems in use today are described in considerable detail and span the gamut from subsistence culture to high-tech aquaponics. Subsistence culture has improved the nutritional plane of large numbers of people in developing nations, while more intensive culture systems produce fish that are now commonly seen on the menus of highly rated white-tablecloth restaurants.

Aquaculture, in general, has been on the receiving end of numerous criticisms over the past several years, and tilapia culture has not escaped the eyes of the critics. Dr El-Sayed devotes an entire chapter to environmental impacts and discusses how those impacts can be reduced. In these days when sustainability and responsible aquaculture are on the minds of so many, discussion of the issues he addresses is of vital importance.

Finally, what with the explosion of literature on tilapia that has appeared in recent years, the publication of a book that brings everything together is extremely timely. Examination of the table of contents should convince the prospective reader that *Tilapia Culture* does a very good job of covering all aspects of the subject and should quickly become a standard reference work on the topic.

Robert R. Stickney  
*Texas Sea Grant College Program*  
*Texas A&M University*  
USA

*This page intentionally left blank*

# Preface

---

Tilapia are currently known as 'aquatic chicken' due to their high growth rates, adaptability to a wide range of environmental conditions and ability to grow and reproduce in captivity and feed on low trophic levels. It is thus no surprise that these fish have become an excellent candidate for aquaculture, especially in tropical and subtropical environments. Tilapia culture is believed to have originated more than 4000 years ago, but very little information is available on their culture during those ancient times. The first trials of tilapia culture were recorded in Kenya in the 1920s. Since then, tilapia culture has been established in many tropical and subtropical regions, and even in areas beyond their native ranges, where they have been introduced for various purposes. As a result, considerable attention has been paid to tilapia culture during the past three decades. Consequently, tilapia culture is currently practised in more than a 100 countries all around the globe. A plethora of information has also been generated and published in specialized periodicals on the biology and culture of tilapia during the second half of the last century. Key books have also been published on these fish during the last two decades, in addition to the excellent proceedings of the International Symposium on Tilapia in Aquaculture (ISTA), where six proceedings have already been produced. The World Aquaculture Society (WAS) has also contributed significantly to tilapia culture with an excellent series of Tilapia Culture in the Americas and also through the annual 'tilapia update' series, prepared by R. Stickney and published in *World Aquaculture* magazine, which summarizes published papers on tilapia culture.

However, most tilapia farmers, farm owners/managers, researchers and graduate students in developing countries, where over 90% of farmed tilapia are produced, have little or no access to the accumulating information on tilapia culture. The present book is an attempt to pull together, as far as possible, the scientific publications on tilapia culture in a single volume for the benefit of this target audience. It is hoped that this book will provide these target groups with access to published information, especially in areas where the access is lacking. This task was not easy, because the information published on tilapia was too much and too wide to be collected in a single book. Therefore, I must admit here that I was somewhat selective in my endeavour. Selection was made for those publications that were directly related to the practices and enhancement of tilapia culture. Considerable attention was paid to the most recent research published during the past decade. In fact, over 550 references, representing over 55% of the total references cited in the book, were published during 1995–2004. Moreover, about 30% of those references appeared during 2000–2005.

The book includes 12 chapters covering almost all aspects of tilapia culture. Each chapter ends with a number of 'closing remarks' summarizing the main points covered in the chapter. The book begins with a historical review of global and continental tilapia culture, current state, production and future potential, with emphasis on the major cultured species and major producers. In Chapter 2, the basic biology of tilapia, including taxonomy, body shapes, geographical distribution, introductions and transfers, gut morphology and feeding habits, has been briefly reviewed. Chapter 3 describes the environmental requirements of tilapia. Optimum and critical ranges/levels of temperature, salinity, pH, dissolved

oxygen, ammonia and nitrite, photoperiod and turbidity are reviewed. Chapter 4 deals with the culture of tilapia in semi-intensive systems. Full details are presented on pond fertilization, supplemental feeding, polyculture and integrated farming systems. Chapter 5 covers the intensive culture of tilapia in earthen ponds, tanks, raceways, cages, recirculating systems and aquaponics. Chapter 6 discusses tilapia nutrition, including protein, lipid, carbohydrate, vitamin and mineral requirements. Feed sources, digestibility, inclusion levels and feeding methods and frequencies are also described. Reproduction and seed production of tilapia are covered in Chapter 7, with special emphasis on broodstock management, production of monosex tilapia, seed production and larval rearing under different culture systems. Stress and diseases that infect tilapia, both in the wild and in aquaculture environments, including bacterial, parasitic, fungal, viral and non-infectious diseases, in addition to disorders caused by pollution, are discussed in Chapter 8. Chapter 9 deals with the harvesting, processing, marketing and economics of farmed tilapia. The role of tilapia culture in rural development in developing countries is discussed in Chapter 10. Chapter 11 looks at the recent technological innovations in tilapia culture. Modern technologies in reproduction and genetics, namely transgenesis, gynogenesis, androgenesis, cloning, production of genetically male tilapia (GMT) and genetically improved farmed tilapia (GIFT), are all reviewed. The global expansion of tilapia farming at an exceptionally high rate is very likely to pose environmental and socio-economic threats. Chapter 12 considers the environmental impacts of tilapia culture and the best management methods to reduce those impacts.

I hope the reader who is interested in aquaculture in general, or involved in tilapia culture in particular, will find this book useful. I hope also that the objectives for which the book was written have been achieved. Finally, I would very much welcome any feedback from my colleagues and fellow readers.

Professor Abdel-Fattah M. El-Sayed  
*Alexandria, Egypt, April 2005*

# Acknowledgements

---

I would like to thank the following, who have provided me with photographs, reprints, data, advice and unpublished information by personal communication. However, the responsibility for all of the content of the book resides with me as author.

**Ahmed H. Al-Harbi:** Fish Culture Project, Natural Resources and Environment Research Institute, King Abdulaziz City for Science and Technology, Riyadh, Saudi Arabia.

**Donald S. Bailey:** University of Virgin Islands, Agricultural Experimental Station, Kingshill, Virgin Islands, USA.

**Ibrahim S.H. Bilal:** Department of Aridland Agriculture, College of Food Systems, United Arab Emirates University, Al-Ain, United Arab Emirates.

**Randall E. Brummett:** World Fish Centre (ICLARM), Humid Forest Ecoregional Centre, Yaoundé, Cameroon.

**James Diana:** School of Natural Resources and Environment, University of Michigan, Ann Arbor, Michigan, USA.

**Peter Edwards:** Aquaculture and Aquatic Resources Management, School of Environment, Resources and Development, Asian Institute of Technology, Klong Luang, Pathumthani, Thailand.

**Gamal O. El-Naggar:** World Fish Centre, Regional Research Centre for Africa and West Asia, Abbasa, Abu Hammad, Sharkia, Egypt.

**Kevin Fitzsimmons:** Department of Soil, Water and Environmental Science, Environmental Research Laboratory, University of Arizona, Tucson, Arizona, USA.

**General Authority for Fisheries Resources Development (GAFRD):** Madeenet Nasr, Cairo, Egypt.

**Dao H. Giap:** Aquaculture and Aquatic Resources Management, School of Environment, Resources and Development, Asian Institute of Technology, Klong Luang, Pathumthani, Thailand.

**Lake Harvest:** Lake Kariba, Zimbabwe.

**C. Kwei Lin:** Aquaculture and Aquatic Resources Management, School of Environment, Resources and Development, Asian Institute of Technology, Klong Luang, Pathumthani, Thailand.

**David C. Little:** Institute of Aquaculture, University of Stirling, UK.

**Ismail Radwan:** Kafr El-Shaikh Fish Farming Cooperative Society, Al-Hamool, Kafr El-Shaikh, Egypt.

**James E. Rakocy:** University of Virgin Islands, Agricultural Experimental Station, Kingshill, Virgin Islands, USA.

**Mahmoud Rizk:** World Fish Centre, Regional Research Centre for Africa and West Asia, Abbasa, Abu Hammad, Sharkia, Egypt.

**Thesthong Samrit:** Aquaculture and Aquatic Resources Management, School of Environment, Resources and Development, Asian Institute of Technology, Klong Luang, Pathumthani, Thailand.

**Magdy Soliman:** Faculty of Veterinary Medicine, University of Alexandria, Alexandria, Egypt.

**Robert R. Stickney:** Texas Sea Grant College Program, Texas A&M University, College Station, Texas, USA.

**Yang Yi:** Aquaculture and Aquatic Resources Management, School of Environment, Resources and Development, Asian Institute of Technology, Klong Luang, Pathumthani, Thailand.

I would also like to thank **Ram C. Bhujel:** Aquaculture and Aquatic Resources Management, School of Environment, Resources and Development, Asian Institute of Technology, Klong Luang, Pathumthani, Thailand; **Gina Conroy:** Maracay, Estado Aragua, Venezuela; **Ahmed M. Darwish:** Harry K. Dupree Stuttgart National Aquaculture Research Center, United States Department of Agriculture, Agriculture Research Service, Stuttgart, Arkansas, USA; and **László Szathmári:** University of West Hungary, Faculty of Agriculture and Food Sciences, Hungary, for providing me with photographs, even though I could not include those photographs in the book. Thanks are also due to **Elham Wassef:** National Institute of Oceanography and Fisheries, Alexandria, Egypt, for reading the draft text and making some valuable editing corrections. The effort made by **Essam Abdel-Mawla:** National Institute of Oceanography and Fisheries, Alexandria, Egypt, in editing many of the photographs included in the book is highly appreciated.

Finally, I could not have finished this task without the patience and support of my wife Azza and my daughters Israa and Ayat.



# 1

## Current State and Future Potential\*

---

### 1.1. Historical Review

Aquaculture is the farming of aquatic organisms, including fish, molluscs, crustaceans and aquatic plants, in freshwater, brackish-water and seawater environments. Capture fisheries, on the other hand, are the exploitation of aquatic organisms by the public as a common property resource, with or without appropriate licences. Aquaculture's contribution to total global fisheries landings was very low during 1950–1970, ranging from only 638,577 Mt (3.2%) in 1950 to 5.2% in 1970. Global aquaculture production continued to grow to 9.6% in 1980 and 16.3% in 1990. In the 1990s and early 2000s, this production grew at an outstanding rate to reach an annual rate of 32.1% in 2000, 34% in 2001 and 35.2% in 2002 (Fig. 1.1). The average annual compounded growth rate of aquaculture production was 9% per year during 1970–2000, compared with only 1.3% for capture fisheries (Tacon, 2003). Half of total global aquaculture production in 2002 was finfish (25,728,611 Mt).

Tilapia are freshwater fish belonging to the family Cichlidae. They are native to Africa, but were introduced into many tropical, subtropical and temperate regions of the world during the second half of the 20th century (Pillay, 1990). The introduction of tilapia into those areas was for: (i) farming as food fish; (ii) recreational fishing; (iii) aquatic weed control; and (iv) research purposes. Tilapia have many attributes that make them an ideal candidate for aquaculture, especially in developing countries. These include:

1. Fast growth.
2. Tolerance to a wide range of environmental conditions (such as temperature, salinity, low dissolved oxygen, etc.).
3. Resistance to stress and disease.
4. Ability to reproduce in captivity and short generation time.
5. Feeding on low trophic levels and acceptance of artificial feeds immediately after yolk-sac absorption.

Tilapia culture is believed to have originated some 4000 years ago, about 1000 years before carp culture was introduced into China (Balarin and Hatton, 1979). However, other than biblical references and illustrations from ancient Egyptian tombs, very little information is available on their culture during those early times. Current Food and Agriculture Organization (FAO) aquaculture production statistics indicate that about 100 countries practise tilapia culture, since these countries reported tilapia production from aquaculture in 2002 (FAO, 2004). The global development of tilapia culture has passed through three distinctive phases (Fig. 1.2): before 1970; from 1970 to 1990; and from 1990 to now.

**BEFORE 1970.** The contribution of tilapia production to total global aquaculture production before 1970 was very minor, representing less than 1% of total production. For example, tilapia production in 1969 was only 24,633 Mt, representing 0.76% of total aquaculture production (3,238,079 Mt). Very few countries practised

\*Unless otherwise indicated, all data presented in this chapter are derived from FAO *Fishstat Plus* (2004).

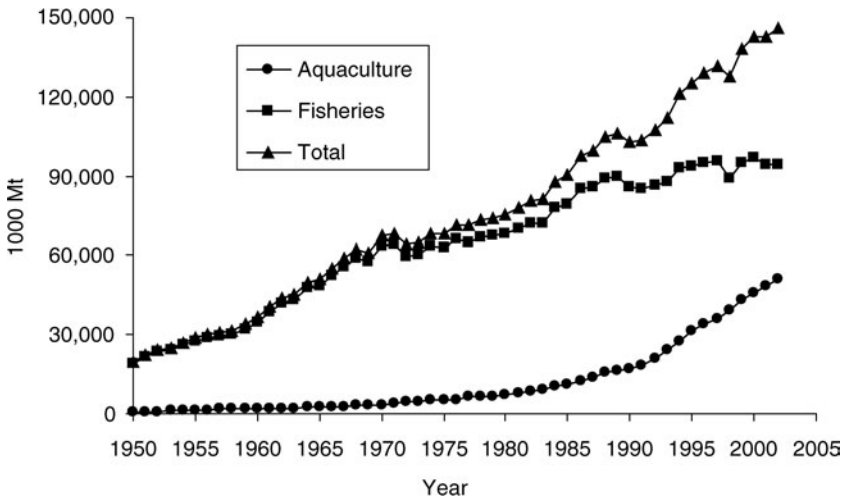

Fig. 1.1. Global fisheries and aquaculture production (1000 Mt) during 1950–2002.

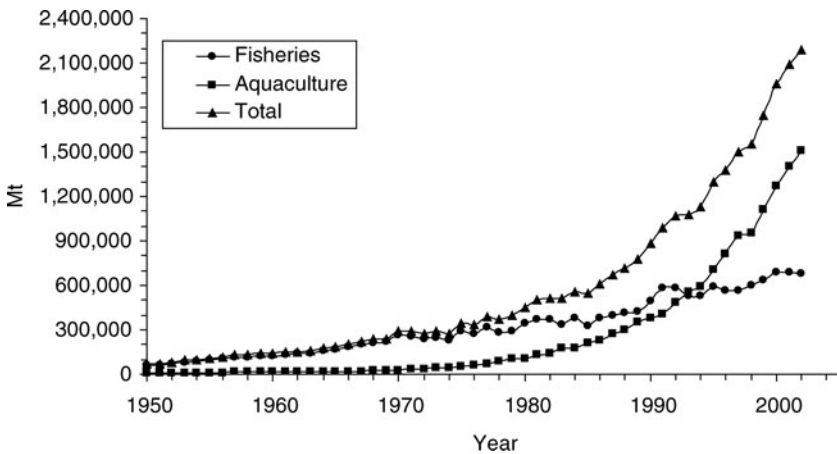

Fig. 1.2. Global production (Mt) of tilapia from aquaculture and capture fisheries during 1950–2002.

tilapia culture during that period. Only seven countries reported tilapia production in 1950, increasing to 12 countries in 1969. Taiwan, China, Egypt, Nigeria, Israel and Thailand were the major tilapia producers. The insignificant contribution of tilapia production during that period was mainly because aquaculture in general, and tilapia culture in particular, was not known as a food production system in most countries.

FROM 1970 TO 1990. Tilapia culture was gradually expanding worldwide during the period from 1970 to 1990. The number of countries practising

tilapia culture increased significantly to reach 78 countries in 1990, compared to only 12 countries in 1969. However, tilapia production in many of those countries was very limited. According to FAO aquaculture production statistics, out of those 78 countries, 40 countries produced less than 100 Mt/year each. The production of farmed tilapia gradually increased to reach 383,654 Mt by 1990, representing 2.28% of total aquaculture production in 1990. During that period, the annual growth of tilapia production fluctuated between <6% and >28%, with an average of 14.2%.

FROM 1990 TO NOW. Tilapia culture has witnessed a huge expansion during the past decade. As a result, the number of countries practising tilapia culture has reached over 100, as mentioned earlier. The production of farmed tilapia has also increased more than 390% to jump from 383,654 Mt in 1990, representing 2.28% of total aquaculture production, to 1,505,804 Mt in 2002, representing 2.93% of total production. The average annual growth of tilapia production during that period approached 12.2%.

## 1.2. Global Tilapia Production

### 1.2.1. Capture fisheries

Global landing of tilapia from capture fisheries increased progressively during the 1950s to the 1980s. During the 1990s and early 2000s, the landings were almost stable, fluctuating around 585,000–680,000 Mt/year (Fig. 1.2). Africa is by far the most important tilapia producer from capture fisheries, where it contributed about 70% of global landing in 2002, followed by Asia (18%), North America (9%) and South America (3%) (Figs 1.3 and 1.4). Therefore, it is no surprise that, among the world's top ten tilapia producers from

capture fisheries, six are African countries. In addition, Egypt and Uganda, the first and second largest world tilapia producers, landed over 138,000 and 98,000 Mt in 2002, representing 20% and 14% of global landings (Fig. 1.5). The top ten producers included three Asian countries (Thailand, the Philippines and Sri Lanka) and one North American country (Mexico).

Among all tilapia species, Nile tilapia (*Oreochromis niloticus*) is the most important identified species in capture fisheries. In 2002, the production of that species approached 253,871 Mt, representing 37% of total production. Other identified species include Mozambique tilapia (*Oreochromis mossambicus*), blue tilapia (*Oreochromis aureus*), jaguar guapote (*Parachromis managuensis*) and mango (Galilee) tilapia (*Sarotherodon galilaeus*). However, most tilapia catches are not identified. For example, 59% of the catch in 2002 was reported under 'unidentified' cichlids, 'mouthbrooding' cichlids and 'unidentified' tilapias.

### 1.2.2. Aquaculture

As pointed out earlier, the production of farmed tilapia increased from 28,260 Mt in 1970 to 1,505,804 Mt in 2002. However, these values may

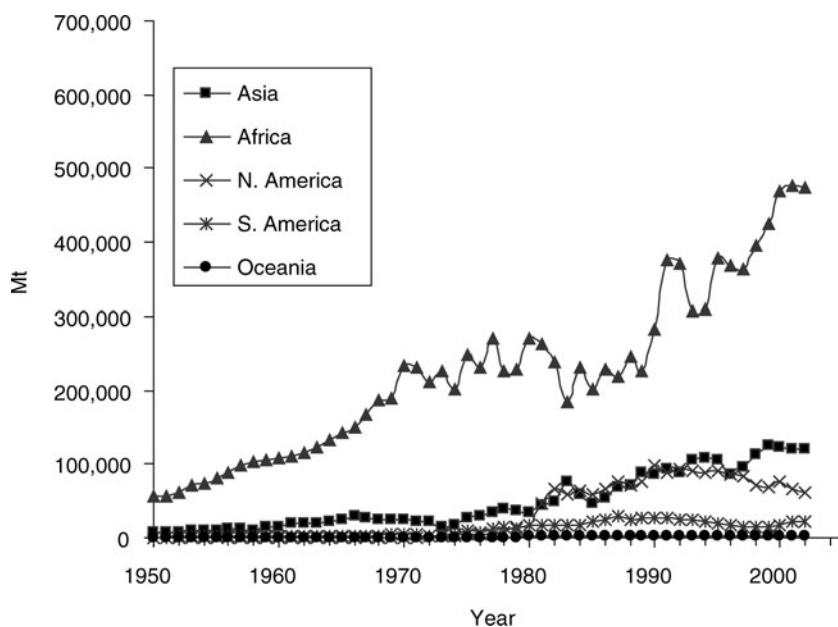

Fig. 1.3. Tilapia capture (Mt) by region during 1950–2002.

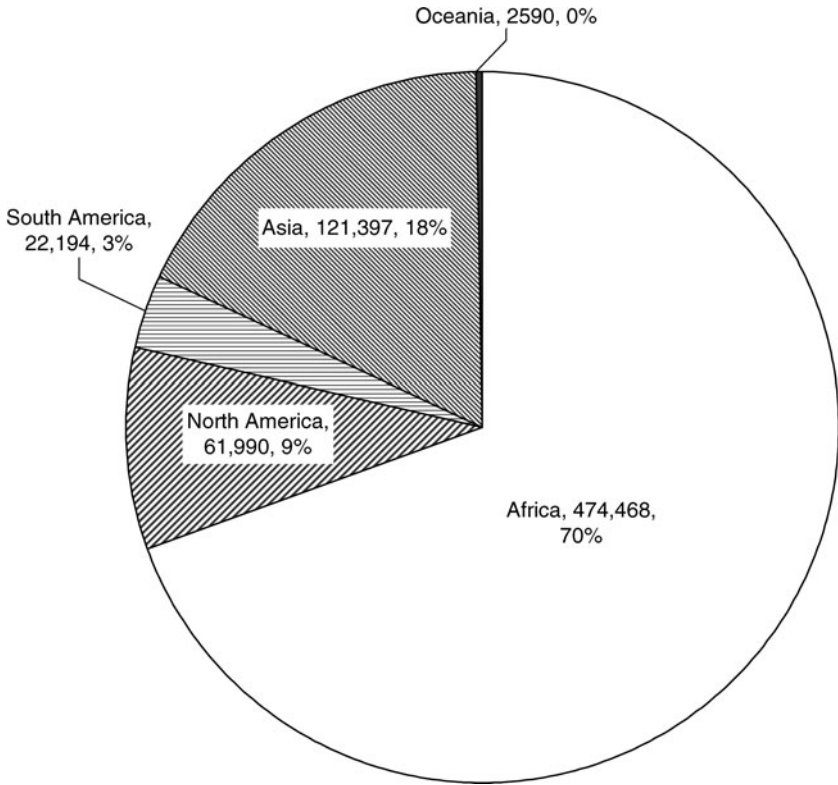

Fig. 1.4. Tilapia production from capture fisheries (Mt, %) by region in 2002.

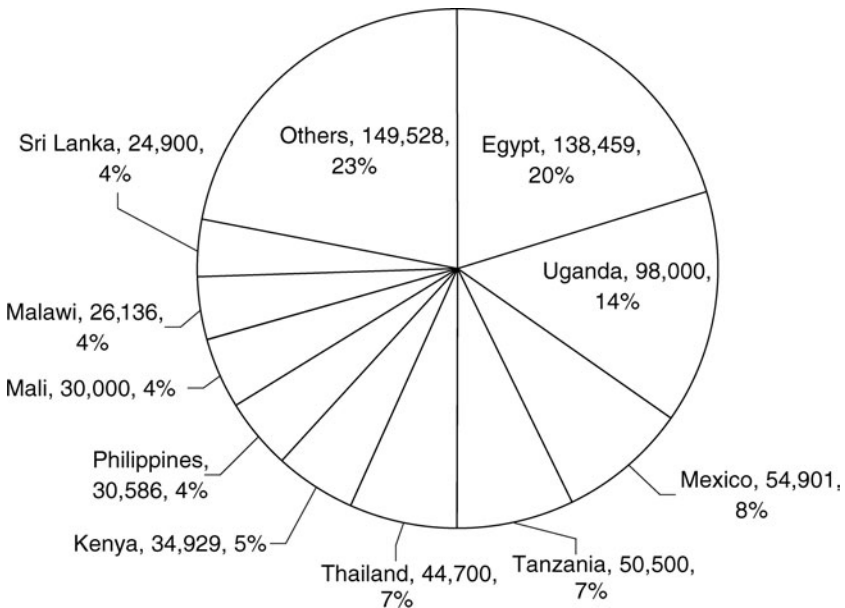

Fig. 1.5. Top ten producers of tilapia from capture fisheries (Mt, %) in 2002.

be much less than the actual amounts produced. The under-reporting of tilapia production can be attributed to the following:

1. The reproductive characteristics of tilapia. The simple, frequent and asynchronous reproduction of tilapia makes the estimate of total production of these fish almost impossible.
2. The poor management of evaluating and utilizing tilapia. The large amounts consumed by tilapia farmers' families and the amounts that are locally marketed informally may make production statistics incorrect and unreliable. For example, it has been reported that about 20% of aquaculture production in rural China is consumed by farmers' families. The global production of farmed tilapia may, therefore, be higher than the officially reported quantities.

The global production trends of farmed tilapia can be divided into two distinctive phases:

- During the 1950s to 1970s tilapia culture grew at a relatively slow rate, where farmed tilapia production was much lower than that of capture fisheries (Fig. 1.2).
- In the 1980s to 1990s, tilapia culture expanded at a much wider and more rapid rate, where the gap between tilapia landings from capture fisheries and aquaculture continued

to narrow, until the production of farmed tilapia exceeded the landings from capture fisheries in 1993 (Fig. 1.2). Since then, tilapia culture has been growing at a very high rate, while tilapia landings from capture fisheries are about stable.

Since tilapia can tolerate a wide range of water salinity, they are currently farmed in freshwater, brackish-water and even seawater environments, but freshwater tilapia aquaculture dominates. The production of tilapia from freshwater systems reached 1,312,776 Mt in 2002, representing 87.2% of total farmed tilapia production.

The value of farmed tilapia has also witnessed a great increase during the past two decades. The value increased from about US\$154 million in 1984 to US\$1800.7 million in 2002. As expected, the value of Nile tilapia represented between 60 and > 70% of the total market value of farmed tilapia during the past decade (Fig. 1.6).

### 1.2.3. Major producers

Despite the fact that more than 100 countries practised tilapia farming in 2002, only five countries (China, Egypt, the Philippines, Indonesia and Thailand) dominated world production.

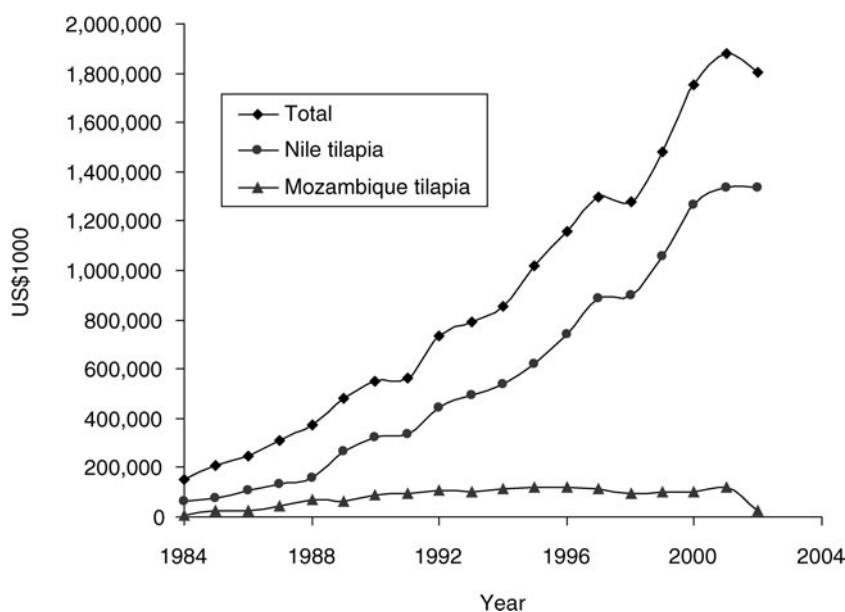

Fig. 1.6. The value of important farmed tilapia (US\$1000) during 1984–2002.

Those countries yielded 87% of global tilapia production in 2002. China alone produced 706,585 Mt in 2002, representing 50% of total production, followed by Egypt (12%), the Philippines (9%), Indonesia (8%) and Thailand (7%) (Fig. 1.7). However, the value of farmed tilapia in China in 2002 was only US\$706.6 million, representing only 2.15% of the total value of aquaculture production in China (US\$32,827 million). This is mainly because tilapia is produced in China as a low-value food fish and used typically for local consumption in rural areas. The values of farmed tilapia in selected major producer nations are given in Fig. 1.8.

#### 1.2.4. Major cultured species

Among cultured fishes of the world, tilapia rank third in terms of production, only after carps and salmonids. According to FAO statistics, 16 tilapia/cichlid groups, in addition to unidentified cichlids, have been used for aquaculture production.

However, commercial tilapia culture is currently restricted to about ten species (Table 1.1). Nile tilapia is, by far, the most important farmed tilapia species in the world. It represented more than 80% of total tilapia production during 1970–2002. Nile tilapia also ranked sixth in terms of global farmed fish production in 2002, after silver carp, grass carp, common carp, crucian carp and big-head carp (Fig. 1.9). Mozambique tilapia comes second, with a production of 54,146 Mt in 2002, representing 3.6% of the production of total farmed tilapia. Three-spotted tilapia (*Oreochromis andersonii*), blue tilapia, redbreast tilapia (*Tilapia rendalli*) and longfin tilapia (*Oreochromis macrochir*) are also gaining some popularity in certain parts of the world. The contribution of other tilapia species to global tilapia production is insignificant, while unidentified tilapias represent a significant proportion of the production. In 2002, that category amounted to 227,741 Mt, representing 18.7% of total tilapia production.

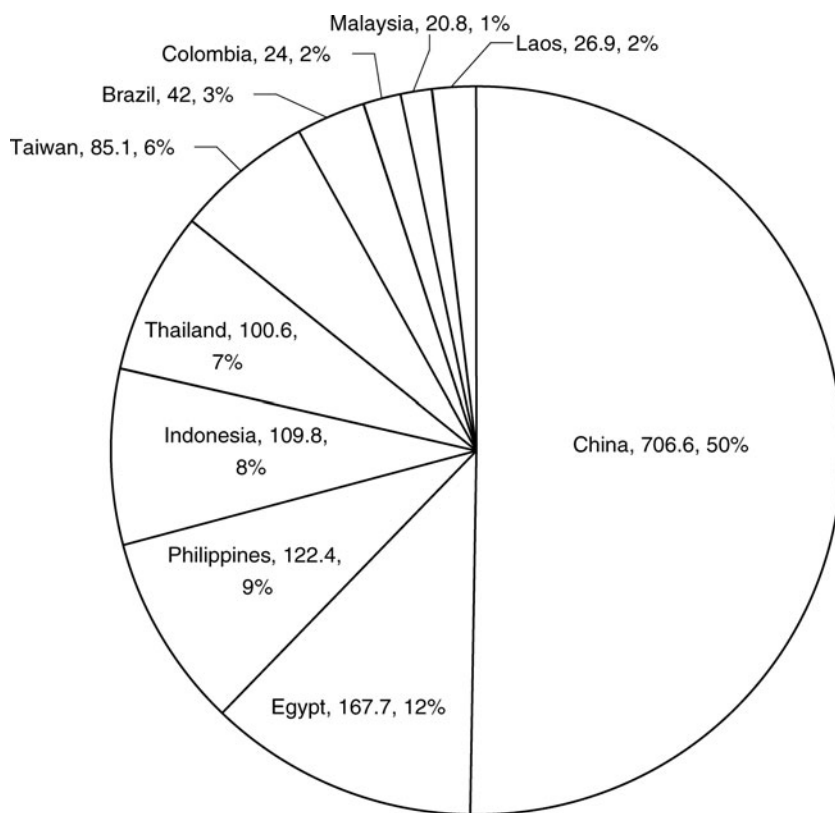

Fig. 1.7. Top ten producers of farmed tilapia (1000 Mt, %) in 2002.

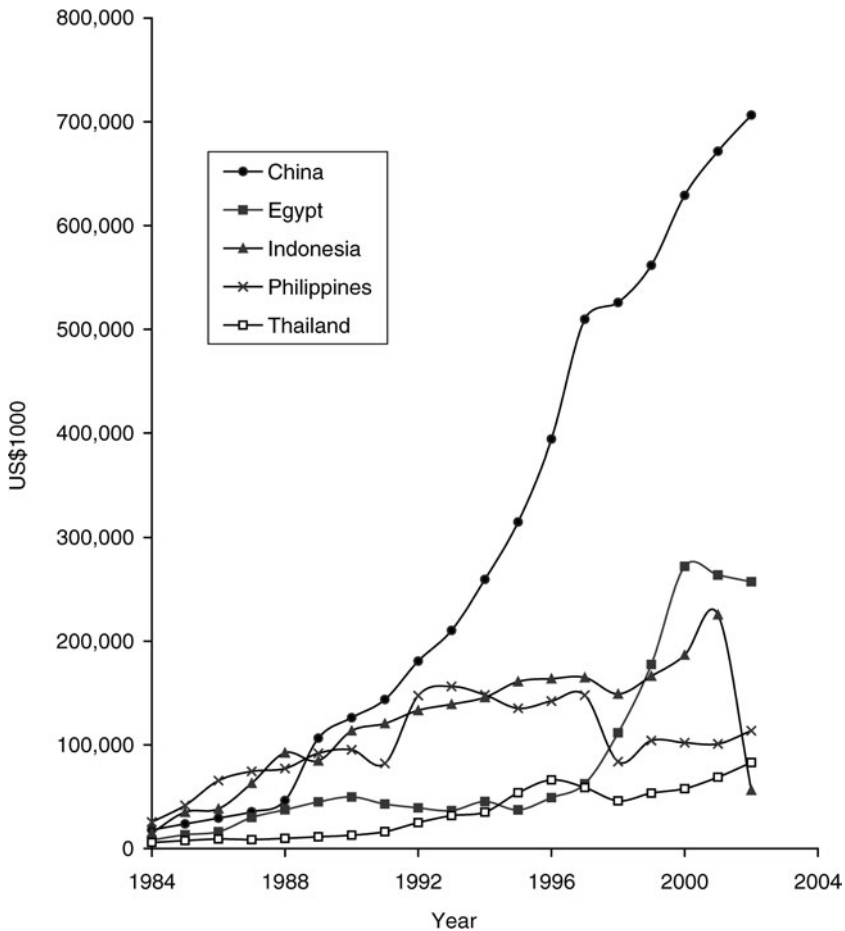

Fig. 1.8. The value of farmed tilapia (US\$1000) for selected major producers during 1984–2002.

### 1.3. Tilapia Production in Asia

Asia is the largest tilapia producer in the world, accounting for 79% of the production of global farmed tilapia in 2002. Tilapia is farmed mainly in freshwater environment in Asia. In 2002, about 95.5% of total farmed tilapia production came from freshwater environments. Twenty-one Asian countries, mainly in South Asia and the Far East, reported tilapia production in 2002. Tilapia culture in Asia has witnessed three developmental phases:

**1. 1950–1980:** During this early period, tilapia culture was practised on a very small scale and grew at slow rates. The production gradually increased from only 4,810 Mt in 1950 to reach 88,011 Mt in 1980.

**2. 1981–1991:** The production of tilapia witnessed a sharp increase from 109,301 Mt in 1981 to reach 353,686 Mt in 1991, with an over 300% increase.

**3. 1992–now:** This period was characterized by an outstanding expansion and development of tilapia culture in Asia. As a result, tilapia production jumped from 421,649 Mt in 1992 to 1,191,611 Mt in 2002 (Table 1.2).

The growth rate in the production of farmed tilapia in Asia during 1950–2002 was among the fastest in world, with an overall average of 20.5% annually. It is noteworthy that the recorded production of tilapia in Asia is lower than the real production, because the production of some other Asian countries, such as Vietnam, Bangladesh,

**Table 1.1.** Major cultured tilapia species and species production (Mt) in the world during 1950–2002 (from FAO, 2004).

| Species               | 1950  | 1960   | 1970   | 1980    | 1990    | 1992    | 1994    | 1996    | 1998    | 2000      | 2001      | 2002      |
|-----------------------|-------|--------|--------|---------|---------|---------|---------|---------|---------|-----------|-----------|-----------|
| Nile tilapia          | 1,590 | 7,736  | 12,058 | 41,357  | 233,601 | 320,092 | 425,500 | 623,652 | 772,706 | 1,047,885 | 1,126,927 | 1,217,055 |
| Mozambique tilapia    | ...   | 1      | 1,186  | 12,640  | 42,912  | 49,327  | 51,872  | 56,311  | 45,822  | 49,418    | 59,264    | 54,146    |
| Three-spotted tilapia | ...   | ...    | ...    | 27      | 1,000   | 1,800   | 2,200   | 2,661   | 2,689   | 2,750     | 2,700     | 2,700     |
| Blue tilapia          | ...   | ...    | ...    | 1,012   | 3,748   | 3,455   | 2,368   | 2,425   | 844     | 1,277     | 1,135     | 1,350     |
| Redbreast tilapia     | ...   | ...    | ...    | ...     | 105     | 524     | 803     | 1,043   | 839     | 853       | 877       | 860       |
| Longfin tilapia       | ...   | ...    | ...    | ...     | 60      | 230     | 350     | 404     | 207     | 210       | 210       | 210       |
| Sabaki tilapia        | ...   | ...    | ...    | ...     | 1       | < 0.5   | 20      | 20      | 103     | 83        | 63        | 165       |
| Redbelly tilapia      | ...   | ...    | ...    | ...     | 8       | 10      | 18      | 20      | 100     | 201       | 201       | 161       |
| Jaguar guapote        | ...   | ...    | ...    | ...     | 6       | 9       | 31      | 152     | 37      | 40        | 42        | 42        |
| Unidentified tilapias | 4,128 | 9,594  | 15,016 | 53,500  | 102,204 | 104,703 | 112,203 | 126,018 | 130,270 | 171,617   | 212,376   | 227,741   |
| Total                 | 5,718 | 17,331 | 28,260 | 108,536 | 383,654 | 488,527 | 595,535 | 812,850 | 953,659 | 1,274,389 | 1,404,904 | 1,505,804 |

... denotes that data are not available, unobtainable or not separately available but included in another category.



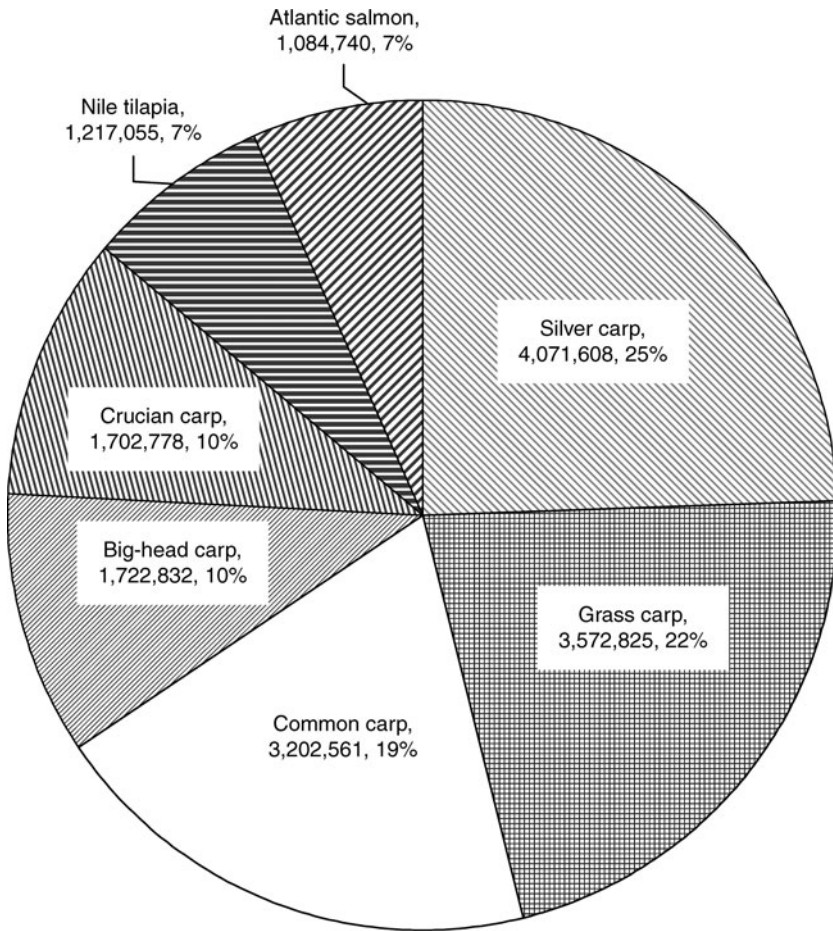

Fig. 1.9. Global production of major farmed fish species (Mt, %) in 2002.

India and Pakistan, was not included in production statistics. In addition, a considerable proportion of produced tilapia is consumed by fish farmers and their families, leading to underestimation of tilapia production in Asia.

### 1.3.1. Major producers

Despite the fact that Asia is the most important tilapia producer in the world, only 21 Asian countries practise tilapia culture (Table 1.3), with China being the largest producer. In 2002, China contributed about 60% of total Asian tilapia production. When the contribution of China is discounted, the contribution of Asia to global tilapia production declines from 79% to only 32.2% in 2002. All the

production of tilapia in China comes from freshwater culture, mainly from semi-intensive culture systems. The production trend in China can be divided into two phases (Fig. 1.10):

- **1950–1988:** During this period, the production of tilapia increased slowly from 660 Mt in 1950 to 39,000 Mt in 1988. Chinese production was exceeded by other Asian countries such as Taiwan, Indonesia and the Philippines.
- **1989–now:** From 1989 onward, the production of farmed tilapia in China increased at an exceptionally high rate, with an average annual growth rate of over 20%. As a result, China currently dominates tilapia production in Asia.

**Table 1.2.** Continental production (Mt) of farmed tilapia during 1950–2002 (from FAO, 2004).

| Year       | 1950  | 1960   | 1970   | 1980   | 1990    | 1992    | 1994    | 1996    | 1998    | 2000    | 2001      | 2002      |
|------------|-------|--------|--------|--------|---------|---------|---------|---------|---------|---------|-----------|-----------|
| Africa     | 908   | 3,399  | 4,723  | 12,456 | 33,094  | 35,715  | 38,164  | 40,077  | 67,421  | 177,202 | 174,985   | 193,240   |
| Asia       | 4,810 | 13,932 | 23,337 | 88,011 | 333,016 | 421,649 | 521,914 | 715,602 | 814,407 | 997,046 | 1,124,602 | 1,191,611 |
| N. America | 0     | 0      | 200    | 7,963  | 14,891  | 18,020  | 22,308  | 24,730  | 25,522  | 33,418  | 37,753    | 45,089    |
| S. America | 0     | 0      | 0      | 103    | 2,307   | 12,732  | 12,728  | 31,849  | 45,716  | 66,087  | 66,966    | 75,328    |
| Oceania    | 0     | 0      | 0      | 0      | 105     | 211     | 221     | 272     | 393     | 456     | 398       | 346       |

**Table 1.3.** Production (Mt) of farmed tilapia by country in Asia during 1950–2002 (from FAO, 2004).

| Country           | 1950  | 1960   | 1970   | 1980   | 1990    | 1992    | 1994    | 1996    | 1998    | 2000    | 2001      | 2002      |
|-------------------|-------|--------|--------|--------|---------|---------|---------|---------|---------|---------|-----------|-----------|
| Brunei            | ...   | ...    | ...    | ...    | 1       | 3       | 3       | 10      | 20      | 14      | ...       | 52        |
| Cambodia          | ...   | ...    | ...    | ...    | 170     | 230     | 200     | 230     | 330     | 370     | 359       | 376       |
| China             | 660   | 5,003  | 5,828  | 9,000  | 106,071 | 157,233 | 235,940 | 394,303 | 525,926 | 629,182 | 671,666   | 706,585   |
| Hong Kong         | ...   | ...    | 450    | 2,120  | 1,195   | 980     | 161     | 442     | 1,058   | 613     | 641       | 411       |
| Indonesia         | 100   | 100    | 1,191  | 14,901 | 53,768  | 59,945  | 64,431  | 75,473  | 65,894  | 85,179  | 105,106   | 109,768   |
| Israel            | 20    | 95     | 1,400  | 2,512  | 4,795   | 3,368   | 5,631   | 6,399   | 6,696   | 7,059   | 8,217     | 7,819     |
| Japan             | ...   | ...    | ...    | 2,392  | 5,825   | 4,697   | 2,125   | 1,479   | 885     | 434     | 434       | 400       |
| Jordan            | ...   | ...    | ...    | ...    | 40      | 16      | 67      | 135     | 263     | 563     | 540       | 515       |
| Republic of Korea | ...   | ...    | ...    | ...    | 650     | 437     | 448     | 998     | 796     | 787     | 609       | 588       |
| Kuwait            | ...   | ...    | ...    | ...    | ...     | ...     | ...     | ...     | 70      | 30      | 16        | 16        |
| Laos              | ...   | ...    | 20     | 176    | 1,250   | 1,345   | 1,400   | 2,000   | 9,549   | 18,928  | 22,499    | 26,872    |
| Lebanon           | ...   | ...    | ...    | ...    | ...     | ...     | ...     | ...     | ...     | ...     | ...       | 25        |
| Malaysia          | ...   | < 0.5  | 12     | 366    | 1,145   | 4,632   | 8,507   | 11,177  | 12,625  | 18,471  | 16,253    | 20,757    |
| Myanmar           | ...   | ...    | ...    | ...    | ...     | ...     | ...     | ...     | ...     | ...     | ...       | 1,000     |
| The Philippines   | ...   | 70     | 1,417  | 13,214 | 76,142  | 91,173  | 90,341  | 79,415  | 72,023  | 92,579  | 106,746   | 122,390   |
| Saudi Arabia      | ...   | ...    | ...    | ...    | 1,926   | 2,191   | 2,220   | 3,614   | 3,315   | 3,968   | 3,981     | 2,019     |
| Singapore         | ...   | ...    | ...    | ...    | ...     | ...     | ...     | 45      | 150     | 37      | 52        | 142       |
| Sri Lanka         | ...   | ...    | ...    | 1,097  | 4,500   | 3,500   | 2,500   | 2,500   | 3,500   | 4,390   | 3,130     | 3,670     |
| Syria             | ...   | ...    | ...    | 102    | 596     | 1,126   | 991     | 1,588   | 1,372   | 2,626   | 3,195     | 2,571     |
| Taiwan            | 3,900 | 8,200  | 11,287 | 33,712 | 52,047  | 47,226  | 47,435  | 44,756  | 36,126  | 49,235  | 82,781    | 85,059    |
| Thailand          | 130   | 464    | 1,732  | 8,419  | 22,895  | 43,547  | 59,514  | 91,038  | 73,809  | 82,581  | 98,377    | 100,576   |
| Total             | 4,810 | 13,932 | 23,337 | 88,011 | 333,016 | 421,649 | 521,914 | 715,602 | 814,407 | 997,046 | 1,124,602 | 1,191,611 |

... denotes that data are not available, unobtainable or not separately available but included in another category.

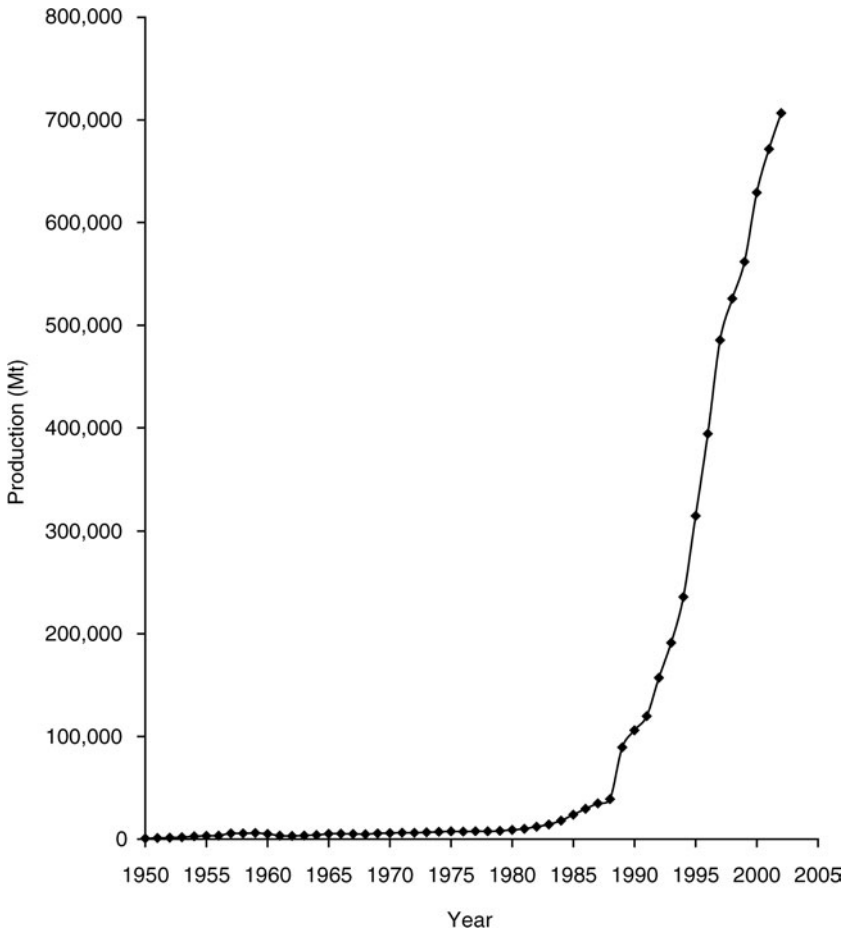

**Fig. 1.10.** Production (Mt) of farmed tilapia in China during 1950–2002.

Tilapia culture is also growing at a very high rate in some other Asian countries, including the Philippines, Indonesia, Thailand and Taiwan. These four countries, together with China, yielded 94% of Asian tilapia production in 2002. Tilapia farming in other Asian countries, such as Saudi Arabia, Israel, Jordan, Syria, India, Bangladesh and Vietnam, has started to gain considerable attention in recent years.

### 1.3.2. Major cultured species

It has been reported that Mozambique tilapia was the first tilapia species to be introduced to Asia, into the Indonesian island of Java, in 1939

(Guerrero, 2001). Subsequently, the species was introduced into other Asian countries, during the 1940s to the 1960s, and was considered a prime candidate for aquaculture in Asia. Thus, the average annual production of this species increased at a rate of 26.7% during 1970–1980, compared with 13.1% for Nile tilapia. However, Mozambique tilapia may have suffered from inbreeding problems due to the small number of the original population of founder stocks. The acceptability of Mozambique tilapia to tilapia farmers was also limited because of the problem of overcrowding and poor growth. The dark colour of this fish also reduces its marketability and consumers' acceptance. Subsequently, Nile tilapia attracted attention in the 1960s and early 1970s as an ideal

aquaculture substitute for Mozambique tilapia. Currently, Mozambique tilapia is a major culture species only in Indonesia. The Indonesian supply of that species in 2002 was 49,331 Mt, representing 93% of total production of farmed Mozambique tilapia in Asia (and 91.1% of global production). The dominance of the species in Indonesia continued until the late 1990s, when Nile tilapia started to take over. For example, Mozambique tilapia accounted for 57.8% of tilapia production in 1999. Its contribution declined in the following years to reach about 52% of total tilapia production in 2001. In 2002, the production of Nile tilapia in Indonesia exceeded that of Mozambique tilapia and reached 60,437 Mt, representing 55% of total tilapia production. This means that commercial culture of Mozambique tilapia in Asia will probably stop within the next few years.

Nile tilapia currently dominates tilapia culture in Asia, with a production of 1,001,302 Mt in 2002, representing 84% of total tilapia production in the continent (Table 1.4). In terms of countries, 11 Asian countries reported Nile tilapia production in 2002, compared to six countries in 1980. On the other hand, only five countries reported Mozambique tilapia culture in Asia in 2002, with a production of 53,000 Mt, representing 4.4% of total tilapia production. The contribution of other tilapias, including blue tilapia, Galilean tilapia (mango tilapia) (*S. galilaeus*), Wami tilapia (*Oreochromis homorum*), Zill's tilapia (redbelly tilapia) (*Tilapia zillii*) and redbreast tilapia (Congo tilapia) (*T. rendalli*), is not significant. These species have been introduced to Asia mainly for research and experimental purposes.

In addition to the species mentioned, introgressive hybridization between Nile tilapia and Mozambique tilapia has been reported in several Asian countries. All-male hybrids of Nile tilapia and blue tilapia are also widely cultured in China and Taiwan. Red tilapia, which is generally a hybrid of Mozambique tilapia and Nile tilapia and/or blue tilapia, is also commonly cultured in many Asian countries, including China, Taiwan, Thailand, Indonesia and the Philippines. The hybrids are characterized by high growth rates, preferred colour and high consumer acceptance. Tilapia hybrids and other 'unidentified' tilapia groups accounted for 11.5% of the total production of farmed tilapia in Asia in 2002.

## 1.4. Tilapia Production in Africa

Despite the fact that tilapia are African fish, tilapia culture in Africa is relatively new, with a low contribution to world tilapia production, being 12.8% in 2002. Farmed tilapia production in Africa, however, has sharply increased during the past few years (Table 1.2). Generally, the trend in tilapia production in Africa can be divided into three phases:

**1. 1950–1984:** During this 35-year period, the production of tilapia slowly grew from 908 Mt in 1950 to 15,747 Mt in 1984.

**2. 1985–1997:** Production jumped from 15,747 Mt in 1984 to 28,724 Mt in 1985, and continued to grow at a relatively slow rate to reach 43,946 Mt in 1997.

**3. 1998–now:** Tilapia production increased from 43,946 Mt in 1997 to 67,421 Mt in 1998, with an increase in growth rate of 53.4%. Another huge increase in tilapia production occurred during 1999–2002, with 119,416, 177,202, 174,985 and 193,240 Mt produced in 1999, 2000, 2001 and 2002, respectively. The average annual growth of tilapia production during the period 1998–2002 was 47.3%, excluding the year 2001, which showed a slight decrease compared to 2000, or 37.6% if the production of the year 2001 is included.

### 1.4.1. Major producers

In 2001, 32 African countries reported production of farmed tilapia; however, in 2002, some of these countries reported no production. Unlike Asia, most of farmed tilapia production in Africa comes from brackish-water environments. In 2002, tilapia production from brackish water amounted to 138,923 Mt, representing 71.9% of total African tilapia production. Farmed tilapia output in Africa is dominated by a single country: Egypt (Table 1.5). The production of farmed tilapia in Egypt accounted for 86.8% (167,735 Mt) of total production of tilapia in Africa in 2002. If the contribution of Egypt is discounted, Africa's contribution to global tilapia output would decline from 12.8% to only 1.7%. Tilapia culture in Egypt is practised mainly in brackish-water environments in the northern lakes areas along the Mediterranean coast. In 2002, the production of tilapia from brackish-water systems in Egypt reached 138,456 Mt, representing

**Table 1.4.** Major cultured tilapia species and species production (Mt) reported in Asia during 1950–2002 (from FAO, 2004).

| Species               | 1950  | 1960   | 1970   | 1980   | 1990    | 1992    | 1994    | 1996    | 1998    | 2000    | 2001      | 2002      |
|-----------------------|-------|--------|--------|--------|---------|---------|---------|---------|---------|---------|-----------|-----------|
| Blue tilapia          | ...   | ...    | ...    | ...    | < 0.5   | < 0.5   | < 0.5   | < 0.5   | ...     | ...     | ...       | ...       |
| Mozambique tilapia    | ...   | 1      | 1,186  | 12,637 | 42,664  | 48,806  | 51,489  | 55,733  | 44,879  | 48,532  | 58,095    | 53,000    |
| Nile tilapia          | 890   | 5,636  | 9,464  | 31,781 | 200,814 | 296,748 | 391,204 | 584,640 | 700,964 | 853,630 | 937,524   | 1,001,302 |
| Sabaki tilapia        | ...   | ...    | ...    | ...    | ...     | ...     | 20      | 20      | 103     | 83      | 63        | 165       |
| Unidentified tilapias | 3,920 | 8,295  | 12,687 | 43,593 | 89,538  | 76,095  | 79,201  | 75,209  | 68,461  | 94,801  | 128,920   | 137,144   |
| Total                 | 4,810 | 13,932 | 23,337 | 88,011 | 333,016 | 421,649 | 521,914 | 715,602 | 814,407 | 997,046 | 1,124,602 | 1,191,611 |

... denotes that data are not available, unobtainable or not separately available but included in another category.

**Table 1.5.** Production (Mt) of farmed tilapia by country in Africa during 1950–2002 (from FAO, 2004).

| Country                      | 1950 | 1960  | 1970  | 1980  | 1990   | 1992   | 1994   | 1996   | 1998   | 2000    | 2001    | 2002    |
|------------------------------|------|-------|-------|-------|--------|--------|--------|--------|--------|---------|---------|---------|
| Burkina Faso                 | ...  | ...   | ...   | ...   | 3      | 2      | < 0.5  | 30     | 40     | 5       | 5       | 5       |
| Burundi                      | ...  | ...   | ...   | ...   | 30     | 50     | 55     | 50     | 55     | 100     | 100     | 100     |
| Cameroon                     | ...  | ...   | ...   | 25    | 80     | 50     | 45     | 50     | 60     | 40      | 100     | 210     |
| Republic of Central Africa   | ...  | ...   | ...   | 76    | 100    | 337    | 250    | 140    | 80     | 120     | 125     | ...     |
| Democratic Republic of Congo | ...  | ...   | ...   | ...   | 700    | 730    | 650    | 600    | 1,833  | 2,073   | 2,738   | 2,959   |
| Republic of Congo            | ...  | ...   | ...   | ...   | 240    | 191    | 121    | 106    | 140    | 200     | 200     | ...     |
| Côte d'Ivoire                | ...  | ...   | ...   | ...   | 32     | 44     | 109    | 933    | 495    | 967     | 870     | 725     |
| Egypt                        | 700  | 2,100 | 2,500 | 9,000 | 24,916 | 21,505 | 25,214 | 27,854 | 52,755 | 157,425 | 152,515 | 167,735 |
| Ethiopia                     | ...  | ...   | ...   | ...   | 30     | 20     | 30     | 35     | 10     | < 0.5   | < 0.5   | ...     |
| Gabon                        | ...  | ...   | ...   | ...   | 2      | 5      | 23     | 59     | 150    | 533     | 102     | 83      |
| Ghana                        | ...  | ...   | 94    | 251   | 280    | 300    | 330    | 350    | 1,350  | 3,712   | 4,400   | 4,400   |
| Guinea                       | ...  | ...   | ...   | ...   | < 0.5  | < 0.5  | < 0.5  | < 0.5  | < 0.5  | < 0.5   | < 0.5   | ...     |
| Kenya                        | ...  | ...   | ...   | 70    | 405    | 467    | 502    | 500    | 87     | 222     | 412     | 421     |
| Liberia                      | ...  | ...   | ...   | ...   | < 0.5  | < 0.5  | < 0.5  | < 0.5  | ...    | 19      | 12      | 12      |
| Madagascar                   | ...  | ...   | ...   | ...   | 40     | < 0.5  | < 0.5  | < 0.5  | < 0.5  | < 0.5   | < 0.5   | < 0.5   |
| Malawi                       | ...  | ...   | ...   | 30    | 50     | 30     | 28     | 20     | 22     | 500     | 532     | 620     |
| Mali                         | ...  | ...   | ...   | ...   | 10     | 20     | 58     | 35     | 35     | 19      | 350     | 708     |
| Mauritius                    | ...  | ...   | ...   | ...   | 8      | 12     | 32     | 71     | 40     | 44      | 30      | 20      |
| Mayotte                      | ...  | ...   | ...   | ...   | ...    | ...    | ...    | 1      | 2      | 3       | 3       | ...     |
| Mozambique                   | ...  | ...   | ...   | ...   | 15     | 12     | 116    | 4      | < 0.5  | < 0.5   | < 0.5   | 77      |
| Niger                        | ...  | ...   | ...   | ...   | 36     | 8      | 17     | 11     | 12     | 15      | 21      | 40      |

*Continued*

**Table 1.5.** *Continued.*

| Country      | 1950 | 1960  | 1970  | 1980   | 1990   | 1992   | 1994   | 1996   | 1998   | 2000    | 2001    | 2002    |
|--------------|------|-------|-------|--------|--------|--------|--------|--------|--------|---------|---------|---------|
| Nigeria      | 208  | 1,299 | 2,129 | 2,952  | 3,795  | 7,525  | 5,500  | 3,259  | 4,471  | 2,705   | 2,626   | 4,496   |
| Rwanda       | ...  | ...   | ...   | 23     | 154    | 45     | 50     | 90     | 120    | 252     | 381     | 542     |
| Réunion      | ...  | ...   | ...   | ...    | ...    | ...    | ...    | ...    | 75     | 88      | 68      | 60      |
| Senegal      | ...  | ...   | ...   | ...    | 5      | 5      | 31     | 53     | 3      | 9       | 10      | 22      |
| Sierra Leone | ...  | ...   | ...   | 2      | 20     | 20     | 25     | 30     | 30     | 30      | 30      | ...     |
| South Africa | ...  | ...   | ...   | ...    | 30     | 55     | 60     | 15     | 70     | 110     | 200     | 200     |
| Sudan        | ...  | ...   | ...   | ...    | 234    | 200    | 200    | 1,000  | 1,000  | 1,000   | 1,000   | 1,000   |
| Swaziland    | ...  | ...   | ...   | ...    | ...    | ...    | ...    | 47     | 49     | 38      | 40      | ...     |
| Tanzania     | ...  | ...   | ...   | ...    | 375    | 350    | 150    | 200    | 200    | 210     | 300     | 630     |
| Togo         | ...  | ...   | ...   | ...    | 22     | 150    | 150    | 21     | 25     | 102     | 120     | 25      |
| Uganda       | ...  | ...   | ...   | ...    | 32     | 42     | 108    | 40     | 200    | 600     | 1,550   | 1,957   |
| Zambia       | ...  | ...   | ...   | 27     | 1,400  | 3,500  | 4,280  | 4,403  | 3,942  | 4,020   | 3,980   | 3,980   |
| Zimbabwe     | ...  | ...   | ...   | ...    | 50     | 40     | 30     | 70     | 70     | 2,041   | 2,165   | 2,213   |
| Total        | 908  | 3,399 | 4,723 | 12,456 | 33,094 | 35,715 | 38,164 | 40,077 | 67,421 | 177,202 | 174,985 | 193,240 |

... denotes that data are not available, unobtainable or not separately available but included in another category.



82.5% of total tilapia production in the continent. Tilapia culture is also practised in some other countries, including Nigeria, Ghana, Zambia, the Democratic Republic of Congo and Zimbabwe (Table 1.5). The contribution by the rest of African countries is insignificant.

#### 1.4.2. Major cultured species

Seven tilapia species or species groups are used for aquaculture in Africa (Table 1.6). Nile tilapia is by far the most widely cultured species. Nile tilapia was reportedly cultured in 23 African countries out of 32 countries that practised tilapia culture in Africa in 2001. It also accounted for 92.5% of total tilapia production in Africa in 2002. The culture of other tilapia species, namely three-spotted tilapia (Zambia), redbreast tilapia (Malawi), Mozambique tilapia (Malawi), redbelly tilapia (Liberia) and mango tilapia (Liberia), was reported in 2002, though production was very limited. In addition to the species, a considerable proportion of tilapia production is reported under 'unidentified' tilapia and tilapia hybrids. This category comes second after Nile tilapia in terms of production. The production of unidentified tilapias in 2002 amounted to 10,405 Mt, representing 5.4% of total tilapia production.

### 1.5. Tilapia Production in South America

Tilapia culture is relatively new in South America. It started on a small scale, mainly for subsistence farming, in the early 1970s. The first FAO record of tilapia production in the region was reported in Colombia in 1971, with only 1 Mt of Nile tilapia. The progress of tilapia culture in South America can be divided into three phases:

- 1. 1971–1982:** During this period, tilapia culture was practised in only two countries, Colombia and Peru, with very little production, ranging from 1 Mt in 1971 to 182 Mt in 1982.
- 2. 1983–1991:** During this period, the number of countries practising tilapia culture increased gradually to six countries in 1991. Nevertheless, tilapia production was still very low and was dominated by one country: Colombia (87.5%).
- 3. 1992–now:** The production of cultured tilapia in South America increased from 3475 Mt in 1991

to 12,732 Mt in 1992, with a 266% increase. Another jump occurred in 1995, where the production approached 30,032 Mt, with a 136% increase. The production continued to increase at a high rate, to reach 75,328 Mt in 2002, which represented 5% of global production of farmed tilapia. Consequently, the number of countries practising tilapia culture increased to ten (Table 1.7). The average annual growth rate of tilapia production during 1996–2002 was 15.7%. More than 99% of tilapia production comes from freshwater environments.

#### 1.5.1. Major producers

As mentioned earlier, Colombia was the only country practising tilapia culture in South America in the 1970s, while Peru reported tilapia production starting 1979. In 1980, total production of tilapia was only 103 Mt but increased to 2307 Mt in 1990. In 2002, ten countries reported tilapia production. Interestingly, the first record of tilapia production in Brazil appeared in 1995. During 1995–2002, tilapia production in that country increased from 12,014 Mt to 42,003 Mt. This means that Brazil has one of the fastest growth rates of tilapia production in South America, with an average annual growth rate of 20%. As a result, Brazil contributed 55.8% (42,003 Mt) to tilapia production in the continent in 2002.

Departing from the FAO tilapia production statistics, Kubitza (2004) reported that farm-raised tilapia in Brazil reached 57,000 Mt in 2002. Moreover, he stated that, at present, production is estimated at about 70,000 Mt. Colombia and Ecuador are the second and third major tilapia producers, with a production amounting to 24,000 Mt (31.9%) and 8181 Mt (10.9%) in 2002. Brazil, Colombia and Ecuador accounted for 98.5% of total tilapia production in 2002. This means that the current production of tilapia in the other South American countries is not significant (Table 1.7).

#### 1.5.2. Major cultured species

One of the major problems associated with tilapia culture in South America is that most cultured tilapias are not identified. Many tilapia strains and hybrids are currently used for aquaculture, with minimal control and regulation. As a result, most

**Table 1.6.** Major cultured tilapia species and species production (Mt) in Africa during 1950–2002 (from FAO, 2004).

| Species               | 1950 | 1960  | 1970  | 1980   | 1990   | 1992   | 1994   | 1996   | 1998   | 2000    | 2001    | 2002    |
|-----------------------|------|-------|-------|--------|--------|--------|--------|--------|--------|---------|---------|---------|
| Blue tilapia          | ...  | ...   | ...   | ...    | 12     | 24     | ...    | ...    | ...    | ...     | ...     | ...     |
| Longfin tilapia       | ...  | ...   | ...   | ...    | 60     | 230    | 350    | 404    | 207    | 210     | 210     | 210     |
| Mozambique tilapia    | ...  | ...   | ...   | ...    | 30     | 68     | 75     | 57     | 96     | 55      | 145     | 130     |
| Nile tilapia          | 700  | 2,100 | 2,594 | 9,447  | 26,996 | 23,827 | 27,641 | 31,667 | 56,981 | 165,665 | 162,711 | 178,762 |
| Redbelly tilapia      | ...  | ...   | ...   | ...    | 8      | 10     | 18     | 20     | 100    | 201     | 201     | 161     |
| Redbreast tilapia     | ...  | ...   | ...   | ...    | 100    | 503    | 803    | 1,028  | 839    | 853     | 877     | 860     |
| Three-spotted tilapia | ...  | ...   | ...   | 27     | 1,000  | 1,800  | 2,200  | 2,661  | 2,689  | 2,750   | 2,700   | 2,700   |
| Unidentified tilapias | 208  | 1,299 | 2,129 | 2,982  | 4,888  | 9,253  | 7,077  | 4,240  | 6,508  | 7,454   | 8,130   | 10,405  |
| Total                 | 908  | 3,399 | 4,723 | 12,456 | 33,094 | 35,715 | 38,164 | 40,077 | 67,421 | 177,202 | 174,985 | 193,240 |

... denotes that data are not available, unobtainable or not separately available but included in another category.

**Table 1.7.** Production (Mt) of farmed tilapia by country in South America during 1980–2002 (from FAO, 2004).

| Country   | 1980 | 1990  | 1991  | 1992   | 1993   | 1994   | 1995   | 1996   | 1997   | 1998   | 1999   | 2000   | 2001   | 2002   |
|-----------|------|-------|-------|--------|--------|--------|--------|--------|--------|--------|--------|--------|--------|--------|
| Brazil    | ...  | ...   | ...   | ...    | ...    | ...    | 12,014 | 15,700 | 16,845 | 24,062 | 27,104 | 32,459 | 35,830 | 42,003 |
| Colombia  | 93   | 2,040 | 3,040 | 11,050 | 11,046 | 11,084 | 16,057 | 14,026 | 16,112 | 17,665 | 19,842 | 22,870 | 24,000 | 24,000 |
| Ecuador   | ...  | 21    | 33    | 876    | 912    | 68     | < 0.5  | < 0.5  | 1,730  | 1,730  | 4,400  | 9,201  | 5,169  | 8,181  |
| Venezuela | ...  | 4     | 127   | 400    | 700    | 1,103  | 1,650  | 1,700  | 1,936  | 2,010  | 2,320  | 970    | 1,250  | 560    |
| Guyana    | ...  | 30    | 50    | 75     | 100    | 159    | 160    | 160    | 170    | 180    | 369    | 369    | 370    | 370    |
| Peru      | 10   | 186   | 200   | 250    | 181    | 205    | < 0.5  | 47     | < 0.5  | ...    | ...    | 8      | 223    | 122    |
| Suriname  | ...  | ...   | ...   | ...    | ...    | 1      | 1      | 1      | 1      | 1      | 50     | 130    | 54     | 54     |
| Bolivia   | ...  | ...   | ...   | 51     | 79     | 68     | 70     | 55     | 40     | 30     | 30     | 30     | 30     | 35     |
| Paraguay  | ...  | 26    | 25    | 30     | 30     | 40     | 80     | 150    | 210    | 38     | 38     | 40     | 40     | ...    |
| Argentina | ...  | ...   | ...   | ...    | ...    | ...    | ...    | 10     | 10     | ...    | ...    | 10     | ...    | 3      |
| Total     | 103  | 2,307 | 3,475 | 12,732 | 13,048 | 12,728 | 30,032 | 31,849 | 37,054 | 45,716 | 54,153 | 66,087 | 66,966 | 75,328 |

... denotes that data are not available, unobtainable or not separately available but included in another category.

tilapia production in South America is reported in the 'unidentified' category. Out of the 75,328 Mt of tilapia produced in 2002, 62,723 Mt were 'unidentified' tilapias (83.3%). Nile tilapia is the second most important cultured category, where it accounted for 16.5% (12,422 Mt) of total tilapia production in 2002. Other tilapia/cichlids, including *Cichlasoma*, green terror (*Aequidens rivulatus*), Mozambique tilapia, redbreast tilapia and velvety cichlids are also cultured in South America, but on a very small scale, with negligible production (Table 1.8). The culture of *Cichlasoma* stopped completely after 1993, while that of green terror, redbreast tilapia and velvety tilapia stopped in the late 1990s.

## 1.6. Tilapia Production in North America and the Caribbean

Mozambique tilapia were introduced into the Caribbean in 1947 and first came to the USA in 1954 (Fitzsimmons, 2001a). Tilapia culture in North America and the Caribbean is therefore relatively new, beginning in the 1960s and 1970s, on a small scale, mainly for subsistence objectives. The first FAO record of tilapia production appeared in 1970, with 200 Mt from Mexico. During 1984–2002, the production increased progressively at an annual growth rate of 12.75%, to reach 45,089 Mt in 2002 (Table 1.9), which represented about 3% of global tilapia production. More than 99% of tilapia production in North America and the Caribbean comes from fresh-water environments.

### 1.6.1. Major producers

Twenty countries from North America and the Caribbean reported tilapia production in 2002. Unlike Asia, Africa and South America, where a single country in each continent dominates tilapia production, no single country dominates the production in North America and the Caribbean (Table 1.9). Instead, Costa Rica, the USA, Mexico and Jamaica together accounted for 78.7% of tilapia production in 2002 (29.3%, 20%, 16.1% and 13.3%, respectively). Countries such as the Dominican Republic, Guatemala, Honduras, Panama, Cuba and El Salvador are also paying considerable attention to tilapia culture.

The production of the rest of North American countries is not significant.

### 1.6.2. Major cultured species

Nile tilapia is the main tilapia species cultured in North America and the Caribbean. It represented about 54% of tilapia production in the region in 2002. Blue tilapia and the cichlid *Cichlasoma* are also important aquaculture species. On the other hand, the production of Mozambique tilapia has declined from 1747 Mt in 1999 to 733 Mt in 2002. As in the case of South America, several tilapia hybrids and strains are also produced in the region. Therefore, a considerable proportion of produced tilapia is reported in the 'unidentified' category. In 2002, 'unidentified' tilapia represented 38.3% of total tilapia production in the region (Table 1.10).

## 1.7. Future Potential

1. The ever-increasing global growth rate of tilapia culture, accompanied by the continuous introductions of these fish into new geographical areas, reflects a positive future for tilapia culture. Tilapia are expected to play a substantial role as a food fish to meet the needs of the poor for animal protein in developing countries and will probably become an important cash crop in those countries. More value added for tilapia products will also come from developing countries. This will encourage foreign companies to invest in joint ventures in the main producing countries. It is also expected that the increase in tilapia imports will continue.

2. The genetically improved Nile tilapia developed by the International Center for Living Aquatic Resources Management (ICLARM) and the YY males developed by the University of Wales, Swansea, to produce genetically male tilapia (Mair *et al.*, 1997) will probably become a breakthrough in tilapia culture in the near future. Distribution of these tilapia strains has already begun in many countries around the world.

3. China is very likely to continue dominating global tilapia production. In addition, a significant expansion in tilapia farming in other Asian countries, such as Cambodia, Vietnam, Laos and Thailand, is likely to occur (Dey, 2001). It is also

**Table 1.8.** Major cultured tilapia species and species production (Mt) in South America during 1993–2002 (from FAO, 2004).

| Species               | 1993   | 1994   | 1995   | 1996   | 1997   | 1998   | 1999   | 2000   | 2001   | 2002   |
|-----------------------|--------|--------|--------|--------|--------|--------|--------|--------|--------|--------|
| Cichlasoma            | 355    | ...    | ...    | ...    | ...    | ...    | ...    | ...    | ...    | ...    |
| Green terror          | < 0.5  | < 0.5  | < 0.5  | < 0.5  | ...    | ...    | ...    | ...    | ...    | ...    |
| Mozambique tilapia    | 100    | 159    | 160    | 160    | 170    | 180    | 184    | 184    | 183    | 183    |
| Nile tilapia          | 3,863  | 2,925  | 3,817  | 3,378  | 3,328  | 4,185  | 7,844  | 13,143 | 9,506  | 12,422 |
| Redbreast tilapia     | < 0.5  | < 0.5  | < 0.5  | < 0.5  | < 0.5  | < 0.5  | ...    | ...    | ...    | ...    |
| Unidentified tilapias | 8,730  | 9,644  | 26,055 | 28,311 | 33,556 | 41,351 | 46,125 | 52,760 | 57,277 | 62,723 |
| Velvety cichlids      | < 0.5  | < 0.5  | < 0.5  | < 0.5  | < 0.5  | ...    | ...    | ...    | ...    | ...    |
| Total                 | 13,048 | 12,728 | 30,032 | 31,849 | 37,054 | 45,716 | 54,153 | 66,087 | 66,966 | 75,328 |

... denotes that data are not available, unobtainable or not separately available but included in another category.

**Table 1.9.** Production (Mt) of farmed tilapia by country in North America and the Caribbean during 1970–2002 (from FAO, 2004).

| Country             | 1970 | 1980  | 1990   | 1991   | 1992   | 1993   | 1994   | 1995   | 1996   | 1997   | 1998   | 1999   | 2000   | 2001   | 2002   |
|---------------------|------|-------|--------|--------|--------|--------|--------|--------|--------|--------|--------|--------|--------|--------|--------|
| Costa Rica          | ...  | 18    | 232    | 1,200  | 1,350  | 2,360  | 2,790  | 3,800  | 4,100  | 4,100  | 5,398  | 6,588  | 8,100  | 8,500  | 13,190 |
| Cuba                | ...  | 1,012 | 3,733  | 3,313  | 3,425  | 2,337  | 2,363  | 2,096  | 2,418  | 1,888  | 540    | 1,060  | 730    | 480    | 500    |
| Dominican Republic  | ...  | ...   | 100    | 374    | 400    | 218    | 1,311  | 985    | 177    | 344    | 446    | 445    | 994    | 1,666  | 2,084  |
| El Salvador         | ...  | ...   | 4      | 17     | 36     | 105    | 151    | 196    | 93     | 138    | 278    | 141    | 56     | 29     | 405    |
| Guatemala           | ...  | ...   | 161    | 201    | 540    | 486    | 638    | 774    | 1,751  | 2,074  | 1,647  | 3,352  | 2,361  | 2,501  | 2,501  |
| Honduras            | ...  | 6     | 120    | 119    | 173    | 184    | 102    | 172    | 190    | 232    | 102    | 135    | 927    | 1,900  | 2,874  |
| Jamaica             | ...  | 20    | 3,364  | 3,100  | 3,200  | 3,300  | 3,400  | 3,500  | 3,450  | 3,400  | 3,360  | 4,100  | 4,500  | 4,500  | 6,000  |
| Martinique          | ...  | ...   | 36     | 35     | 50     | 62     | 65     | 30     | 13     | 10     | 10     | 10     | 8      | 8      | 8      |
| Mexico              | 200  | 6,907 | 5,000  | 4,500  | 4,600  | 4,800  | 5,439  | 1,482  | 4,800  | 8,318  | 5,398  | 7,023  | 6,726  | 8,845  | 7,271  |
| Nicaragua           | ...  | ...   | 3      | 4      | 4      | 4      | 4      | 5      | 52     | 45     | 15     | 16     | 24     | 64     | 64     |
| Panama              | ...  | ...   | 49     | 83     | 65     | 77     | 109    | 186    | 115    | 102    | 55     | 634    | 900    | 1,181  | 1,181  |
| Puerto Rico         | ...  | ...   | 3      | 164    | 85     | 48     | 43     | 48     | 24     | 6      | 6      | 3      | 15     | 18     | 3      |
| Trinidad and Tobago | ...  | ...   | 2      | 3      | 3      | 4      | 4      | 15     | 15     | 13     | 13     | 12     | 21     | 6      | 6      |
| USA                 | ...  | ...   | 2,041  | 2,041  | 4,082  | 5,670  | 5,888  | 6,838  | 7,242  | 7,648  | 8,251  | 8,051  | 8,051  | 8,051  | 9,000  |
| Total               | 200  | 7,963 | 14,891 | 15,158 | 18,020 | 19,657 | 22,308 | 20,143 | 24,730 | 28,458 | 25,522 | 31,573 | 33,418 | 37,753 | 45,089 |

... denotes that data are not available, unobtainable or not separately available but included in another category.

**Table 1.10.** Major cultured tilapia species and species production (Mt) in North America and the Caribbean during 1970–2002 (from FAO, 2004).

| Species                                  | 1970 | 1980  | 1990   | 1991   | 1992   | 1993   | 1994   | 1995   | 1996   | 1997   | 1998   | 1999   | 2000   | 2001   | 2002   |
|------------------------------------------|------|-------|--------|--------|--------|--------|--------|--------|--------|--------|--------|--------|--------|--------|--------|
| Black-belt cichlid                       | ...  | ...   | 6      | 9      | 16     | 120    | 135    | 140    | 78     | 89     | 30     | 32     | 30     | 32     | 32     |
| Blue tilapia                             | ...  | 1,012 | 3,736  | 3,317  | 3,431  | 2,343  | 2,368  | 2,103  | 2,425  | 1,890  | 844    | 1,324  | 1,276  | 1,133  | 1,350  |
| <i>Cichlasoma nebulosum</i> <sup>a</sup> | ...  | ...   | ...    | ...    | ...    | ...    | 35     | 21     | 66     | 71     | 11     | 14     | 11     | 1,066  | 1,330  |
| Jaguar guapote                           | ...  | ...   | 6      | 6      | 9      | 36     | 31     | 40     | 152    | 168    | 37     | 48     | 40     | 42     | 42     |
| Mozambique tilapia                       | ...  | ...   | 60     | 225    | 240    | 131    | ...    | < 0.5  | 91     | 168    | 517    | 1,747  | 497    | 691    | 733    |
| Nile tilapia                             | ...  | 26    | 3,530  | 3,381  | 3,551  | 3,674  | 3,658  | 3,868  | 3,845  | 3,972  | 10,333 | 12,771 | 15,143 | 16,941 | 24,324 |
| Redbreast tilapia                        | ...  | ...   | 5      | 19     | 21     | 11     | ...    | ...    | 15     | 15     | ...    | ...    | ...    | ...    | ...    |
| Unidentified tilapias                    | 200  | 6,925 | 7,548  | 8,201  | 10,752 | 13,342 | 16,081 | 13,971 | 18,058 | 22,085 | 13,750 | 15,637 | 16,421 | 17,848 | 17,278 |
| Total                                    | 200  | 7,963 | 14,891 | 15,158 | 18,020 | 19,657 | 22,308 | 20,143 | 24,730 | 28,458 | 25,522 | 31,573 | 33,418 | 37,753 | 45,089 |

<sup>a</sup>Not included elsewhere.

... denotes that data are not available, unobtainable or not separately available but included in another category.

expected that the traditional non-acceptance of tilapia in some Asian countries, such as India, Pakistan and Bangladesh, will change, and the interest in tilapia culture in those countries will increase. Therefore, the production of farmed tilapia in Asia is very likely to bloom further in the future.

**4.** The production of tilapia for export is also expected to receive considerable attention. In parallel, a new focus on consumer's preference and product quality will emerge (Dey, 2001). Quality will become a limiting factor for the competition among tilapia producers (see Chapter 9 for further details on tilapia export and import).

**5.** The availability of huge freshwater resources, environmental conditions suitable for tilapia culture and culture inputs in many countries in the Americas (Brazil and Mexico, for instance) make the future of tilapia culture in those regions very bright. Thus, it is no surprise that tilapia production in those regions is expected to reach 500,000 Mt by 2010 and 1,000,000 Mt by 2020 (Fitzsimmons, 2001a). Brazil and Mexico are very likely to become the major tilapia producers in the Americas. Nile tilapia (mainly sex-reversed, all-males) will dominate the production in the future. More tilapia processing and filleting, in addition to new tilapia products, will also occur globally, especially in the Americas, for domestic markets as well as for international markets.

**6.** Unlike Asia and the Americas, the future of tilapia culture in Africa is not clear. The shortage of freshwater resources, culture inputs and technical experience are the main handicaps for tilapia culture development in Africa. These factors may

limit the future expansion of tilapia culture in the continent. However, tilapia culture may still play a significant role in rural development in Africa if it is integrated with other plant/animal farming systems.

## 1.8. Constraints

Despite the bright future of tilapia culture in many parts of the world, there are a number of constraints that might restrict the development of this industry:

- The inadequate knowledge of tilapia farmers in many developing countries of biological, technical, environmental and social factors related to tilapia culture. Understanding these factors is critical for improving farmers' skills and increasing farm productivity and sustainability.
- Lack or shortage of funds and technical assistance in many developing countries, especially in Africa and Latin America.
- Poor fingerling quantity and quality, especially in Asia and the Americas, where most farmed tilapia are derived from very small founder stocks.
- Poor extension service programmes, especially in remote rural areas, where tilapia culture is expected to expand.
- The continuous increase in the cost of culture inputs, such as fingerlings, feeds, fertilizer, fuel, labour, etc., which reduces the profitability of tilapia culture enterprises.
